# Supplementary material
Source: PubMed Central journal article supplement (PMC3076850)
Supplement: 1016113108_pnas.1016113108_SI.pdf [file 1016113108_pnas.1016113108_SI.pdf]

# Supporting Information

Moscoso et al. 10.1073/pnas.1016113108

## SI Materials and Methods

Purification, sample preparation, and cryoelectron microscopy of o-gp140 $\Delta$ V2TV1 was performed as follows. Recombinant gp140 was expressed in a CHO cell line and isolated to 95% purity using a four step chromatography purification regime, with a *Galanthus nivalis* agglutinin lectin column to capture the Env construct, followed by a diethylaminoethyl column and a ceramic hydroxyapatite column, respectively, to capture contaminating proteins while Env flowed through, and concluding with size exclusion chromatography to isolate the trimeric form. Samples were prepared on holey carbon grids with a solution concentration of 0.1 mg/mL. The initial concentration of 0.2 mg/mL was halved when it was observed that some micrographs had areas of dense protein concentration not amenable to particle selection. Solutions of gp140

were diluted with Tris buffer (20 mM, pH 7.9) and 50 mM NaCl was added. To elicit the liganded conformation, gp140 was incubated overnight at 4 °C with CD4m in excess concentration.

Samples were imaged using a JEOL 2100F field emission electron microscope at 200 kV, with an electron dose of approximately 15 e<sup>-</sup>/Å<sup>2</sup> (1, 2). A total of 101 micrographs for the unliganded state and 46 micrographs for the liganded state (Fig. S3A and B) were recorded at 80,000 $\times$  magnification and used for single particle reconstruction via the EMAN software package (3). Roughly 4,500 individual native particle images and approximately 2,700 particle images of the liganded state were selected (Figs. S4 and S5).

1. Buchbinder SP, et al. (2008) Efficacy assessment of a cell-mediated immunity HIV-1 vaccine (the Step Study): A double-blind, randomised, placebo-controlled, test-of-concept trial. *Lancet* 372:1881–1893.
2. Kawano MA, et al. (2009) Calcium bridge triggers capsid disassembly in the cell entry process of simian virus 40. *J Biol Chem* 284:34703–34712.
3. Ludtke SJ, Baldwin PR, Chiu W (1999) EMAN: Semiautomated software for high-resolution single-particle reconstructions. *J Struct Biol* 12:82–97.

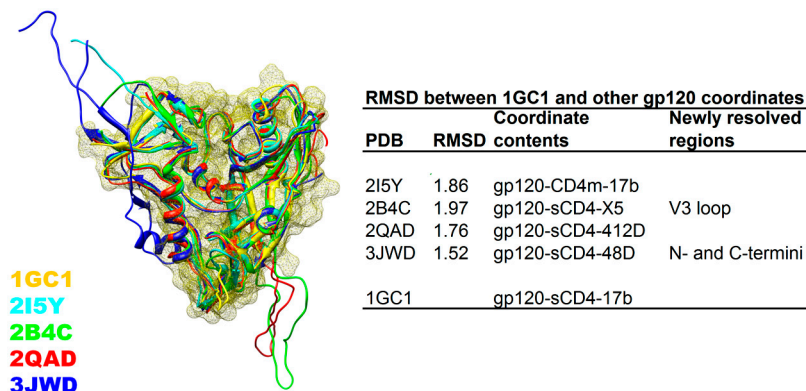

**Fig. S1.** Structural comparison of selected existing HIV-1 gp120 coordinates. X-ray crystallographic coordinates of gp120 in complex with various ligands structurally matched using least-squares fitting. (Left) Four sets of gp120 coordinates were fitted to the earliest set of gp120 coordinates (PDB 1GC1). (Right) The table indicates the root mean square deviation (rmsd) between PDB 2I5Y, 2B4C, 2QAD, and 3JWD. As shown, the rmsd between 1GC1 and the other gp120 coordinates is consistently below 2 Å, thus giving similar results in docking.



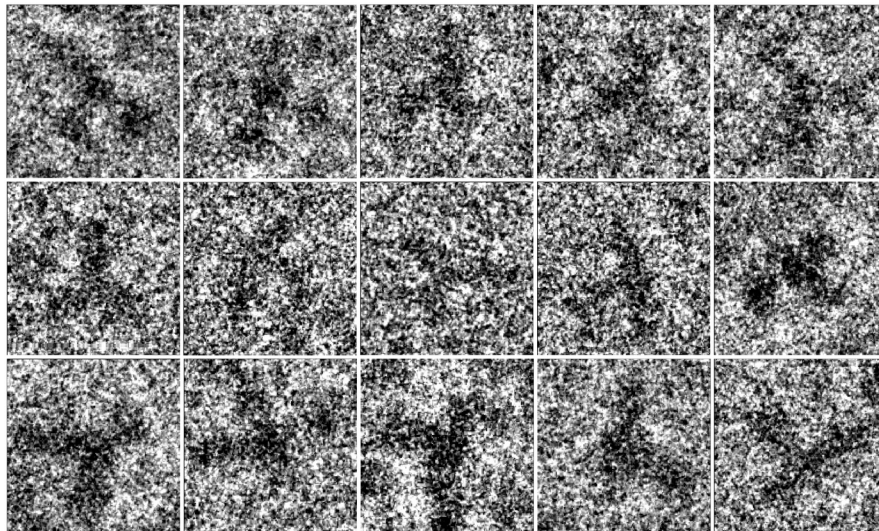

**Fig. S4.** Sample raw unliganded gp140 trimer images. Cryoelectron micrograph boxed particles displaying unliganded gp140. As evident from the images, gp140 is in a fan-blade motif with the gp120 subunits extending from the central stalk of gp41. Note the almost contiguous interface between gp120 and gp41, suggesting close association between these subunits.

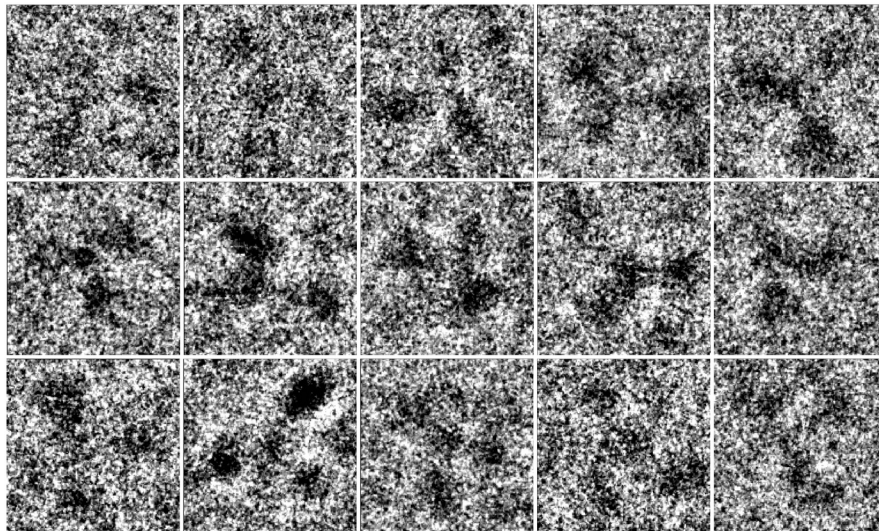

**Fig. S5.** Sample raw CD4m-bound gp140 trimer images. Cryoelectron micrograph boxed particles displaying CD4m-liganded gp140. The boxed particles clearly show a diminished interface between the gp120 subunits and the central gp41 stalk. Such a decreased contact with gp41 could trigger the conformational changes required to expose the gp41 N-terminal hydrophobic fusion peptide, priming it for insertion into the host membrane and initiating membrane fusion.
